# Supplementary material for: Condition responsive nanoparticles for managing infection and inflammation in keratitis
Source: Royal Society of Chemistry journal article supplement (doi:10.1039/c7nr00922d), 2017-01-01
Supplement: c7nr00922d1.pdf [file c7nr00922d1.pdf]

## **Condition responsive nanoparticles for managing infection and inflammation in keratitis**

Saad M. Ahsan & Ch. Mohan Rao\*

*Centre for Cellular and Molecular Biology (CCMB), Council of Scientific and Industrial Research, Uppal Road,  
Hyderabad – 500 007, Telangana State, India*

\*Corresponding author

Email: [mohan@ccmb.res.in](mailto:mohan@ccmb.res.in)

Address: Dr. Ch. Mohan Rao

Centre for Cellular and Molecular Biology (CCMB),

Council of Scientific and Industrial Research,

Hyderabad 500 007, India

URL: [www.ccmb.res.in/staff/mohan](http://www.ccmb.res.in/staff/mohan)

Ph.No.- +91-40-27195631

Fax No.- +91-40-27195633

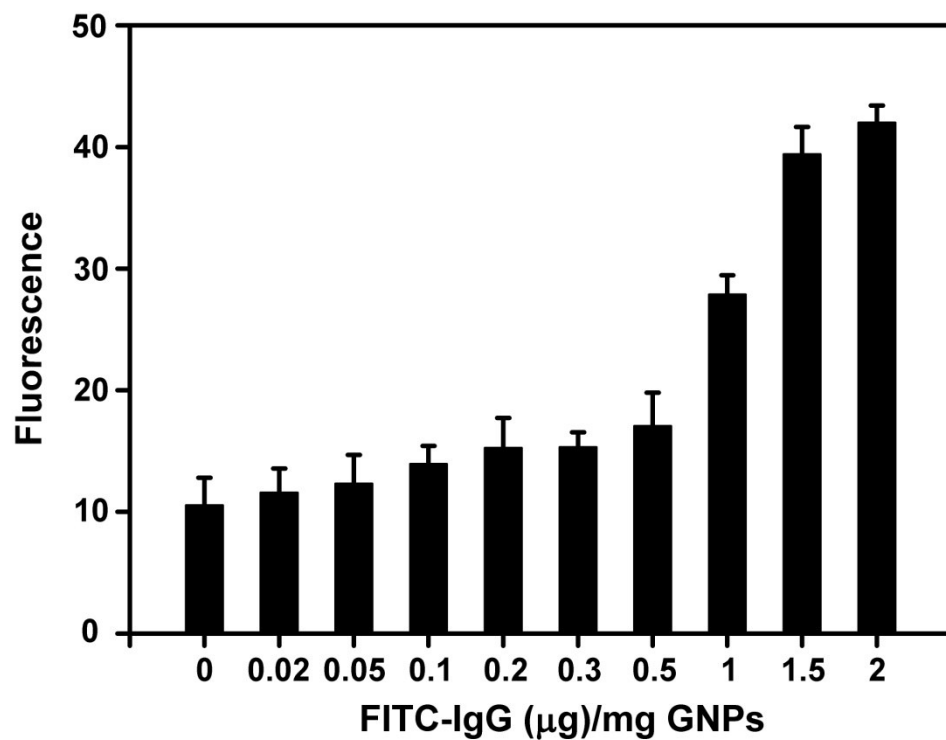

Figure S1: FITC-IgG conjugation to GNPs. EDC-activated nanoparticles were incubated with varying concentrations of FITC-IgG and incubated for 24 h at 4 °C. FITC-IgG conjugated GNPs were washed by centrifugation and resuspension in PBS and analyzed for antibody conjugation by monitoring particle associated fluorescence through flow cytometry using a BD FACSCalibur™ cell analyzer.

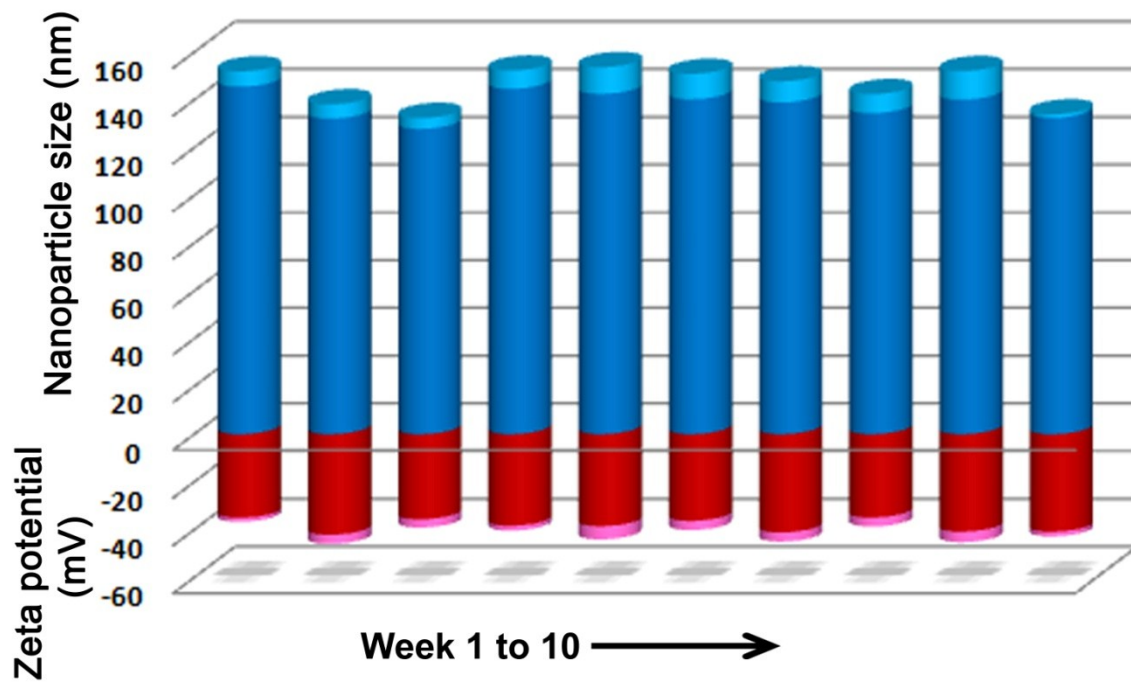

Figure S2: Stability of anti-TLR4-GNPs in PBS was tested by monitoring the size and zeta potential changes over a span of 10 weeks. All values are expressed as mean  $\pm$  SD (n = 3).

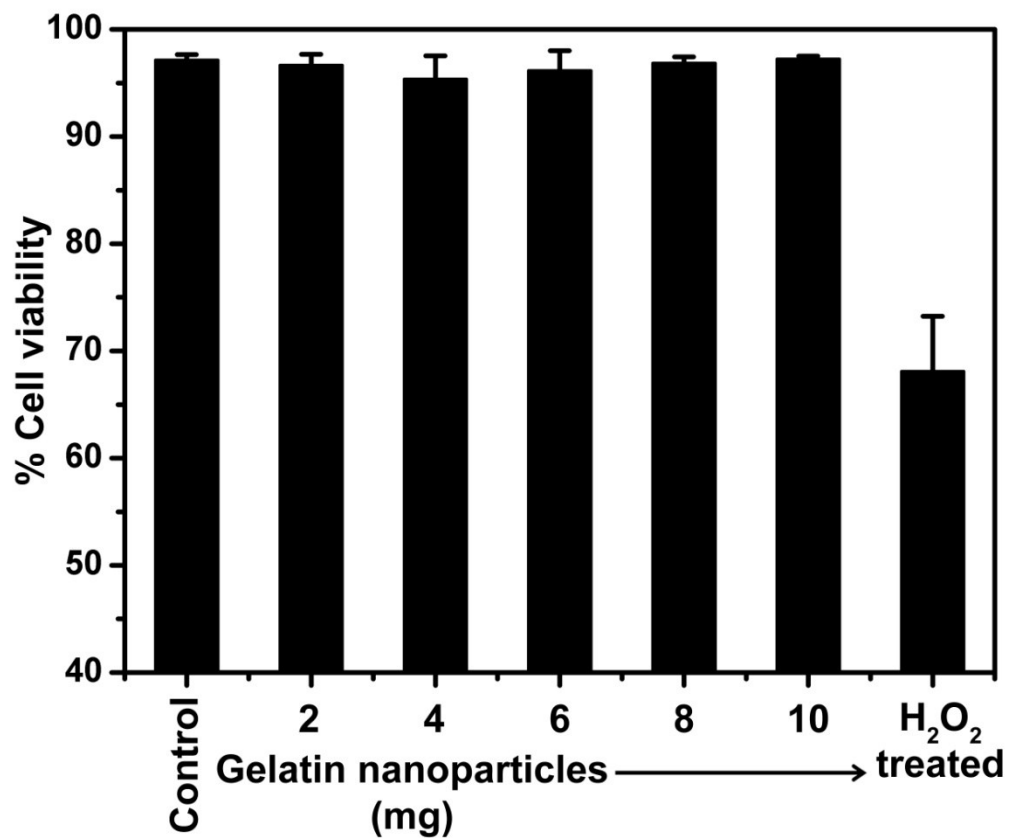

Figure S3: Biocompatibility of gelatin nanoparticles. % cell viability of cells treated with gelatin nanoparticle as determined propidium iodide (PI) uptake followed by flow cytometry. Untreated cells served as negative control while hydrogen peroxide (H<sub>2</sub>O<sub>2</sub>) treated cells served as positive control.

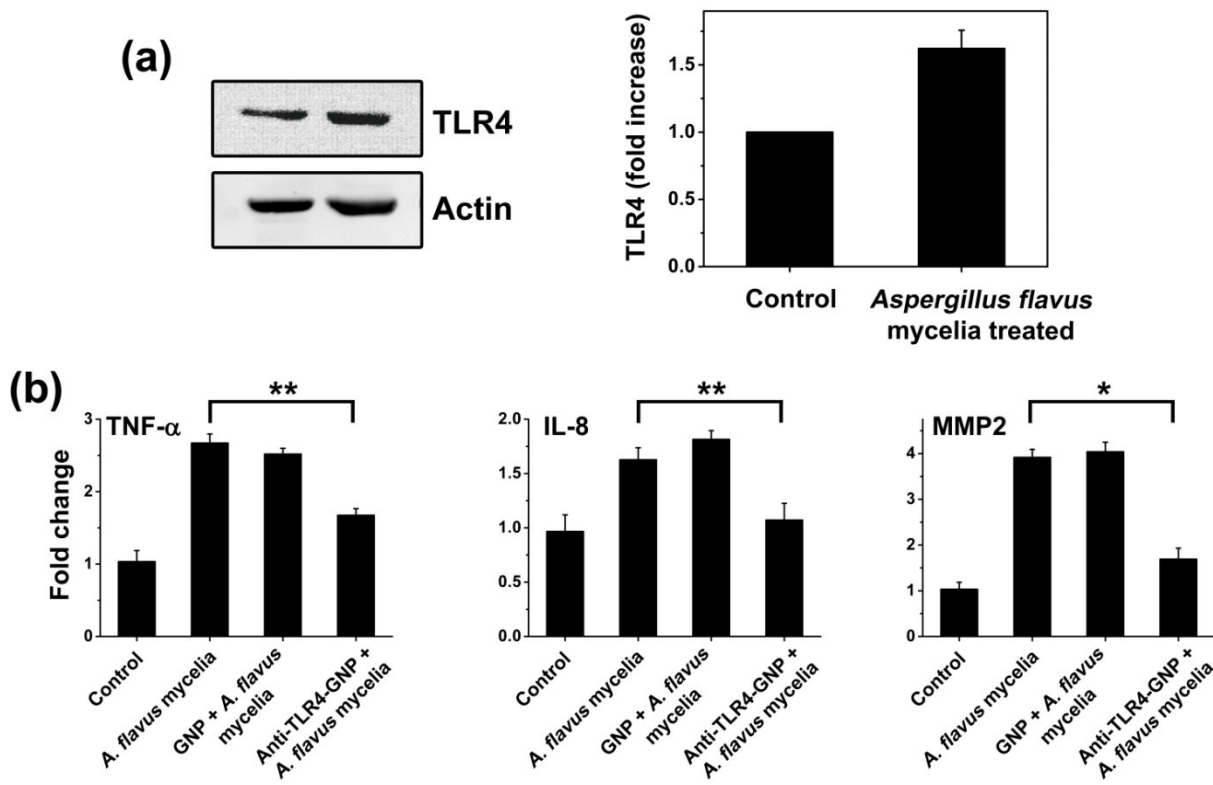

Figure S4: *Aspergillus flavus* induced TLR4 expression in human corneal epithelial (HCE) cells and anti-TLR4-GNP mediated suppression of inflammatory cytokines. (a) Western blot analysis of TLR4 over-expression in Human Corneal Epithelial (HCE) cells upon treatment with *Aspergillus flavus* mycelia ( $0.2 \mu\text{g mL}^{-1}$ ). Histogram representing the fold increase in TLR4 expression upon treatment with *Aspergillus flavus* mycelia. (Actin was used as an endogenous control). (b) Fold change in mRNA levels of TNF- $\alpha$ , IL-8 and MMP2 in Human Corneal Epithelial (HCE) cells treated with *Aspergillus flavus* mycelia, GNPs + *Aspergillus flavus* mycelia and anti-TLR4-GNPs + *Aspergillus flavus* mycelia. Untreated cells served as control. Bars represent mean  $\pm$  SD (n=3) (\*p<0.05, \*\*p<0.01).
